# Supplementary material
Source: Springer Nature journal article supplement (https://www.springermedizin.de/resource/supplementary/12880_2014_237_MOESM3_ESM.pdf/9450302)

The  
Switch

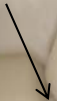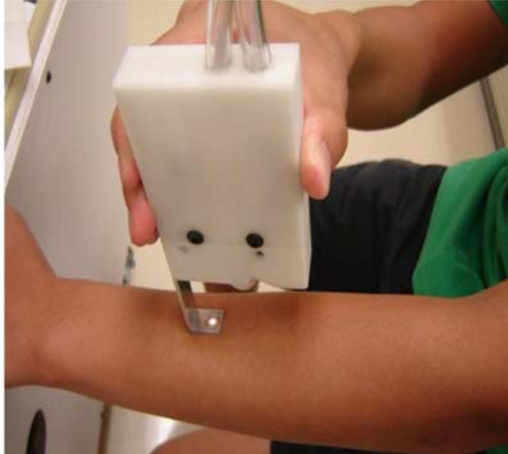

Supplement: MOESM3 [file 9450302]
